# Supplementary material for: A highly stable Pd/SiO2/cordierite monolith catalyst for 2-ethyl-anthraquinone hydrogenation
Source: Royal Society of Chemistry journal article supplement (doi:10.1039/c5ra17285c), 2015-01-01
Supplement: c5ra17285c1.pdf [file c5ra17285c1.pdf]

## Supplementary Information

Table S1 Specific surface area of slurries and catalysts

| Sample                                                         | Specific surface area (m <sup>2</sup> /g) |
|----------------------------------------------------------------|-------------------------------------------|
| Al <sub>2</sub> O <sub>3</sub> before ball-milling             | 154.1                                     |
| Dried Al <sub>2</sub> O <sub>3</sub> slurry after ball milling | 71.5                                      |
| SiO <sub>2</sub> before ball milling                           | 290.5                                     |
| Dried SiO <sub>2</sub> slurry after ball milling               | 240.1                                     |

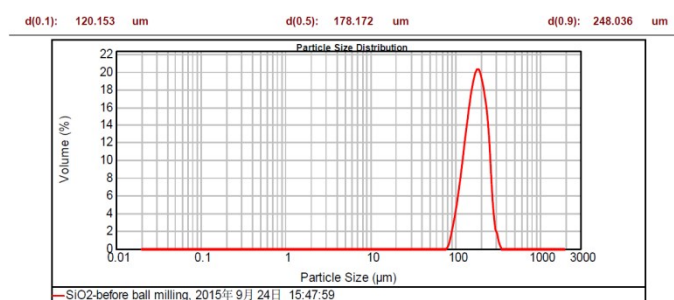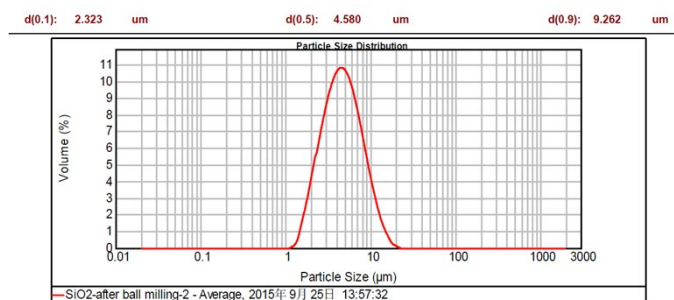

Figure S1. Particle size distribution of SiO<sub>2</sub> before and after ball milling (450 rpm for 6 h in water)

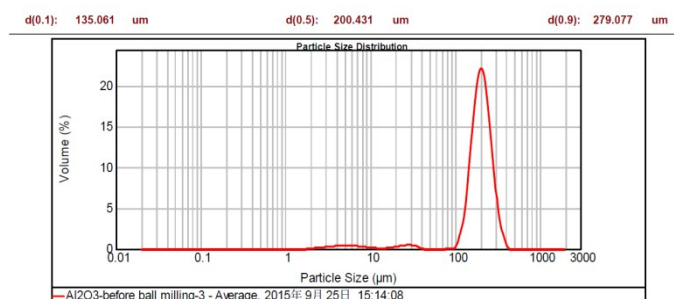

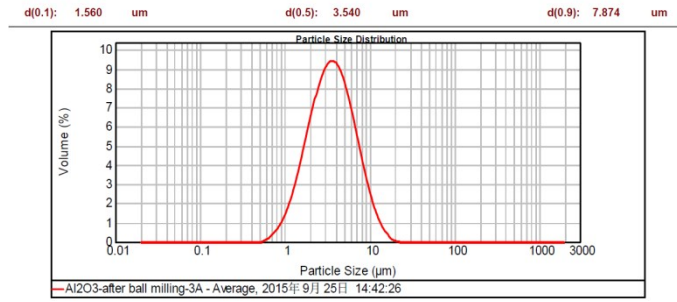

Figure S2. Particle size distribution of  $\text{Al}_2\text{O}_3$  before and after ball milling (500 rpm for 16 h in dilute  $\text{HNO}_3$  solution)

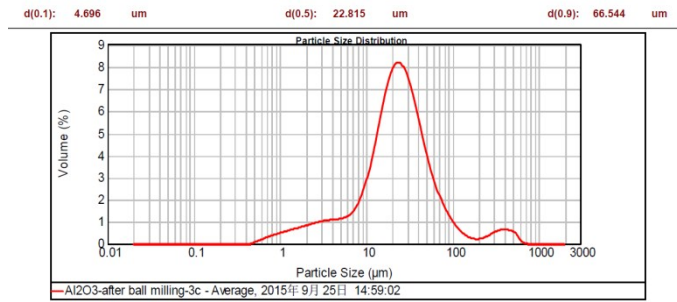

Figure S3. Particle size distribution of  $\text{Al}_2\text{O}_3$  after ball milling (450 rpm for 6 h in water)
